# Supplementary material for: Correction: Oncogenic Transformation by Inhibitor-Sensitive and -Resistant EGFR Mutants
Source: PubMed Central journal article supplement (PMC11405057; doi:10.1371/journal.pmed.1004470), 2024-09-16
Supplement: pmed.1004470.s001.pdf [file pmed.1004470.s001.pdf]

③ big CPE experiments (Whei) "2/25"

|         | G719S Iressa   |              |       | G719S Tarceva  |              |       | G719S AEE      |              |       | G719S CGP      |              |       |
|---------|----------------|--------------|-------|----------------|--------------|-------|----------------|--------------|-------|----------------|--------------|-------|
|         | small colonies | big colonies | total | small colonies | big colonies | total | small colonies | big colonies | total | small colonies | big colonies | total |
| 0       | 39             | 23           | 62    | 4              | 28           | 32    | 7              | 35           | 42    | 8              | 25           | 33    |
| 0.00001 | 32             | 2            | 34    | 6              | 13           | 19    | 5              | 18           | 23    | 5              | 23           | 28    |
| 0.0001  | 25             | 4            | 29    | 11             | 22           | 33    | 8              | 29           | 37    | 8              | 24           | 32    |
| 0.001   | 12             | 12           | 24    | 4              | 16           | 20    | 5              | 29           | 34    | 8              | 19           | 27    |
| 0.01    | 17             | 1            | 18    | 8              | 4            | 12    | 7              | 4            | 11    | 6              | 11           | 17    |
| 0.1     | 8              | 0            | 8     | 0              | 1            | 1     | 0              | 1            | 1     | 6              | 14           | 20    |
| 1       | 2              | 0            | 2     | 0              | 0            | 0     | 0              | 0            | 0     | 3              | 8            | 11    |
| 10      | 0              | 0            | 0     | 0              | 0            | 0     | 0              | 0            | 0     | 1              | 0            | 1     |
| 100     | 0              | 0            | 0     | 0              | 0            | 0     | 0              | 0            | 0     | 0              | 0            | 0     |

|         | ins124 Iressa  |              |       | ins124 Tarceva |              |       | ins124 AEE     |              |       | ins124 CGP     |              |       |
|---------|----------------|--------------|-------|----------------|--------------|-------|----------------|--------------|-------|----------------|--------------|-------|
|         | small colonies | big colonies | total | small colonies | big colonies | total | small colonies | big colonies | total | small colonies | big colonies | total |
| 0       | 13             | 40           | 53    | 24             | 29           | 53    | 14             | 35           | 49    | 22             | 21           | 43    |
| 0.00001 | 23             | 43           | 66    | 14             | 31           | 45    | 18             | 30           | 48    | 21             | 21           | 42    |
| 0.0001  | 26             | 34           | 60    | 17             | 26           | 43    | 23             | 32           | 55    | 12             | 19           | 31    |
| 0.001   | 20             | 40           | 60    | 10             | 20           | 30    | 4              | 31           | 35    | 14             | 21           | 35    |
| 0.01    | 21             | 36           | 57    | 24             | 26           | 50    | 16             | 29           | 45    | 15             | 22           | 37    |
| 0.1     | 17             | 39           | 56    | 24             | 29           | 53    | 22             | 31           | 53    | 19             | 26           | 45    |
| 1       | 15             | 24           | 39    | 14             | 25           | 39    | 8              | 14           | 22    | 19             | 17           | 36    |
| 10      | 0              | 0            | 0     | 0              | 0            | 0     | 0              | 0            | 0     | 23             | 21           | 44    |
| 100     | 0              | 0            | 0     | 0              | 0            | 0     | 0              | 0            | 0     | 4              | 23           | 27    |

|         | del3 Iressa    |              |       | del3 Tarceva   |              |       | del3 AEE       |              |       | del3 CGP       |              |       |
|---------|----------------|--------------|-------|----------------|--------------|-------|----------------|--------------|-------|----------------|--------------|-------|
|         | small colonies | big colonies | total | small colonies | big colonies | total | small colonies | big colonies | total | small colonies | big colonies | total |
| 0       | 28             | 24           | 52    | 24             | 16           | 40    | 24             | 15           | 39    | 33             | 7            | 40    |
| 0.00001 | 28             | 5            | 33    | 27             | 14           | 41    | 30             | 7            | 37    | 20             | 7            | 27    |
| 0.0001  | 10             | 0            | 10    | 22             | 5            | 27    | 14             | 18           | 32    | 25             | 16           | 41    |
| 0.001   | 27             | 5            | 32    | 30             | 14           | 44    | 29             | 13           | 42    | 22             | 10           | 32    |
| 0.01    | 12             | 0            | 12    | 18             | 15           | 33    | 7              | 7            | 14    | 29             | 10           | 39    |
| 0.1     | 0              | 0            | 0     | 0              | 0            | 0     | 0              | 0            | 0     | 29             | 13           | 42    |
| 1       | 0              | 0            | 0     | 0              | 0            | 0     | 0              | 0            | 0     | 21             | 11           | 32    |
| 10      | 0              | 0            | 0     | 0              | 0            | 0     | 0              | 0            | 0     | 0              | 0            | 0     |
| 100     | 0              | 0            | 0     | 0              | 0            | 0     | 0              | 0            | 0     | 0              | 0            | 0     |

see 3/27#1 for graphs

no 2/25#1 data transactions
