# Supplementary material for: Correction: Oncogenic Transformation by Inhibitor-Sensitive and -Resistant EGFR Mutants
Source: PubMed Central journal article supplement (PMC11405057; doi:10.1371/journal.pmed.1004470), 2024-09-16
Supplement: pmed.1004470.s002.pdf [file pmed.1004470.s002.pdf]

|         | WT + EGF Iressa |              |       | WT + EGF Tarceva |              |       | WT + EGF AEE   |              |       | WT + EGF CGP   |              |       |
|---------|-----------------|--------------|-------|------------------|--------------|-------|----------------|--------------|-------|----------------|--------------|-------|
|         | small colonies  | big colonies | total | small colonies   | big colonies | total | small colonies | big colonies | total | small colonies | big colonies | total |
| 0       | 12              | 17           | 29    | 19               | 29           | 48    | 19             | 30           | 49    | 20             | 15           | 35    |
| 0.00001 | 14              | 22           | 36    | 30               | 28           | 58    | 13             | 0            | 13    | 19             | 8            | 27    |
| 0.0001  | 20              | 27           | 47    | 14               | 22           | 36    | 16             | 16           | 32    | 20             | 15           | 35    |
| 0.001   | 8               | 21           | 29    | 15               | 16           | 31    | 16             | 15           | 31    | 7              | 16           | 23    |
| 0.01    | 25              | 16           | 41    | 36               | 17           | 53    | 17             | 19           | 36    | 10             | 14           | 24    |
| 0.1     | 21              | 10           | 31    | 14               | 15           | 29    | 21             | 17           | 38    | 15             | 13           | 28    |
| 1       | 12              | 4            | 16    | 10               | 5            | 15    | 0              | 0            | 0     | 4              | 15           | 19    |
| 10      | 0               | 0            | 0     | 0                | 0            | 0     | 0              | 0            | 0     | 15             | 4            | 19    |
| 100     | 0               | 0            | 0     | 0                | 0            | 0     | 0              | 0            | 0     | 0              | 0            | 0     |

|         | L858R Iressa   |              |       | L858R Tarceva  |              |       | L858R AEE      |              |       | L858R CGP      |              |       |
|---------|----------------|--------------|-------|----------------|--------------|-------|----------------|--------------|-------|----------------|--------------|-------|
|         | small colonies | big colonies | total | small colonies | big colonies | total | small colonies | big colonies | total | small colonies | big colonies | total |
| 0       | 23             | 50           | 73    | 11             | 19           | 30    | 5              | 19           | 24    | 12             | 22           | 34    |
| 0.00001 | 22             | 4            | 26    | 6              | 10           | 16    | 6              | 15           | 21    | 11             | 15           | 26    |
| 0.0001  | 19             | 0            | 19    | 6              | 14           | 20    | 11             | 23           | 34    | 8              | 32           | 40    |
| 0.001   | 6              | 11           | 17    | 8              | 14           | 22    | 11             | 25           | 36    | 9              | 32           | 41    |
| 0.01    | 13             | 0            | 13    | 2              | 16           | 18    | 2              | 3            | 5     | 14             | 23           | 37    |
| 0.1     | 1              | 0            | 1     | 1              | 0            | 1     | 0              | 0            | 0     | 8              | 29           | 37    |
| 1       | 0              | 0            | 0     | 0              | 0            | 0     | 0              | 0            | 0     | 6              | 19           | 25    |
| 10      | 0              | 0            | 0     | 0              | 0            | 0     | 0              | 0            | 0     | 0              | 0            | 0     |
| 100     | 0              | 0            | 0     | 0              | 0            | 0     | 0              | 0            | 0     | 0              | 0            | 0     |

|         | L858R + EGF Iressa |              |       | L858R + EGF Tarceva |              |       | L858R + EGF AEE |              |       | L858R + EGF CGP |              |       |
|---------|--------------------|--------------|-------|---------------------|--------------|-------|-----------------|--------------|-------|-----------------|--------------|-------|
|         | small colonies     | big colonies | total | small colonies      | big colonies | total | small colonies  | big colonies | total | small colonies  | big colonies | total |
| 0       | 27                 | 18           | 45    | 22                  | 13           | 35    | 30              | 16           | 46    | 20              | 16           | 36    |
| 0.00001 | 23                 | 14           | 37    | 17                  | 14           | 31    | 14              | 17           | 31    | 24              | 13           | 37    |
| 0.0001  | 20                 | 6            | 26    | 20                  | 13           | 33    | 18              | 14           | 32    | 35              | 13           | 48    |
| 0.001   | 34                 | 16           | 50    | 10                  | 26           | 36    | 12              | 23           | 35    | 16              | 17           | 33    |
| 0.01    | 27                 | 8            | 35    | 16                  | 20           | 36    | 21              | 26           | 47    | 15              | 8            | 23    |
| 0.1     | 20                 | 0            | 20    | 2                   | 1            | 3     | 0               | 3            | 3     | 21              | 10           | 31    |
| 1       | 0                  | 0            | 0     | 0                   | 0            | 0     | 0               | 0            | 0     | 8               | 18           | 26    |
| 10      | 0                  | 0            | 0     | 0                   | 0            | 0     | 0               | 0            | 0     | 0               | 0            | 0     |
| 100     | 0                  | 0            | 0     | 0                   | 0            | 0     | 0               | 0            | 0     | 0               | 0            | 0     |

*Wes Crisp, PhD*
