# Supplementary material for: Correction: Oncogenic Transformation by Inhibitor-Sensitive and -Resistant EGFR Mutants
Source: PubMed Central journal article supplement (PMC11405057; doi:10.1371/journal.pmed.1004470), 2024-09-16

③ Which Inhibitor/CI is more effective x EGFR Y1068 W

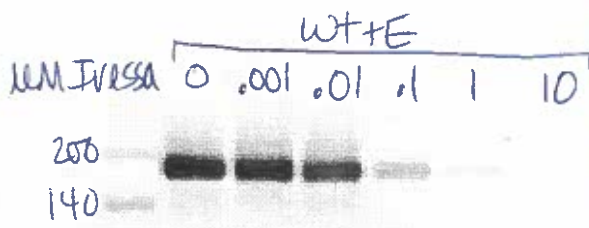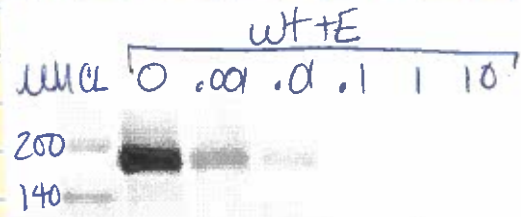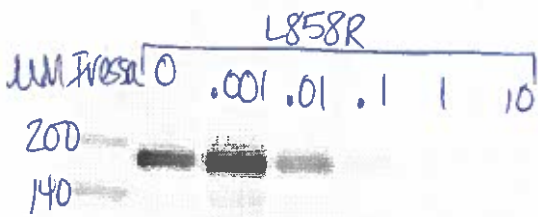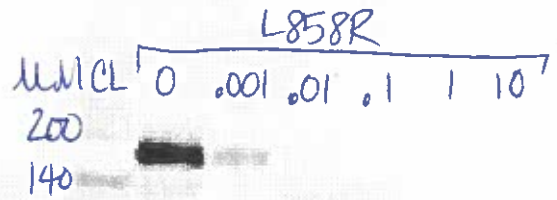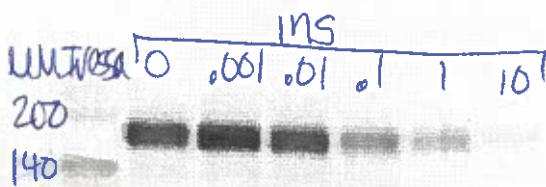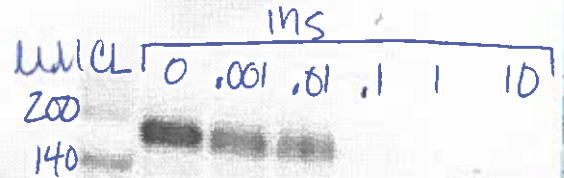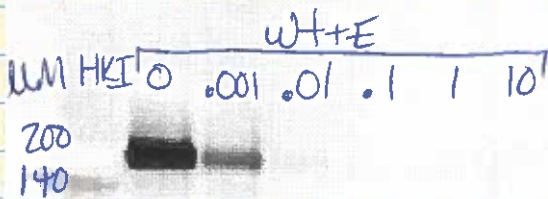

looks great  
 wt+E is clearly less sensitive to  
 Inhibitor than L858R, & Ins is  
 less sensitive than that  
 CI is 10x more effective than Inhibitor  
 for wt+E & L858R, & 100x more  
 effective than Inhibitor &  
 HKI appears to be equally effective  
 for all 3 cell types

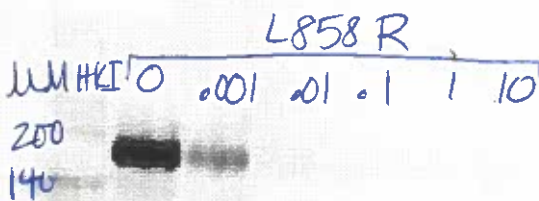

these results more consistent  
 colony data than 526#3  
 these results roughly correlate  
 with 54#5 & 54#8 colony  
 for Inhibitor & CI ± 1 log  
 HKI is extremely effective for  
 EGFR auto-phosphorylation, but the  
 doesn't correlate with colony data  
 (see 625#1) - cpd stability is  
 over 2wk assay?  
 see 625#1 anti-actin

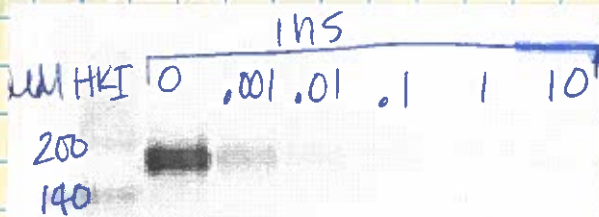

Supplement: pmed.1004470.s005.pdf [file pmed.1004470.s005.pdf]
