# Supplementary material for: Correction: Oncogenic Transformation by Inhibitor-Sensitive and -Resistant EGFR Mutants
Source: PubMed Central journal article supplement (PMC11405057; doi:10.1371/journal.pmed.1004470), 2024-09-16
Supplement: pmed.1004470.s006.pdf [file pmed.1004470.s006.pdf]

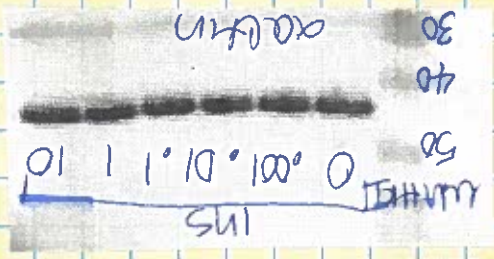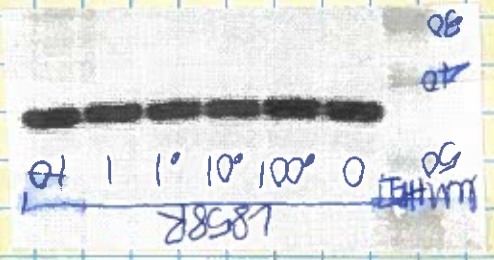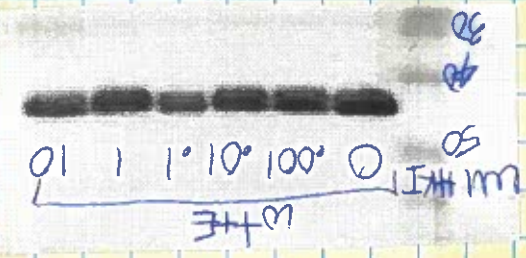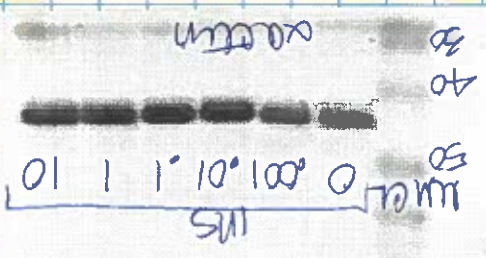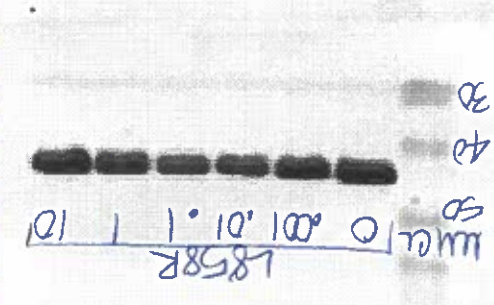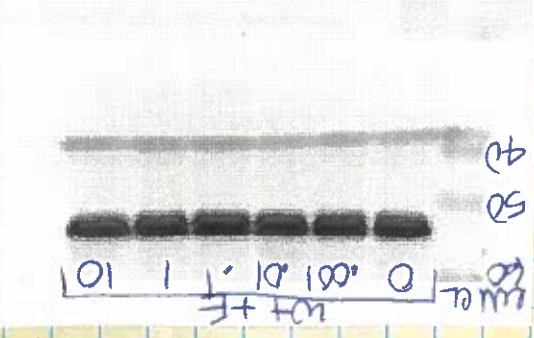

Loadings unequal  
 see ⑤ for  $\alpha$ -tubulin  
 see 7/8#1 for L858R

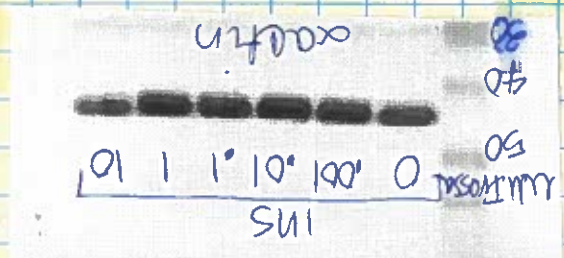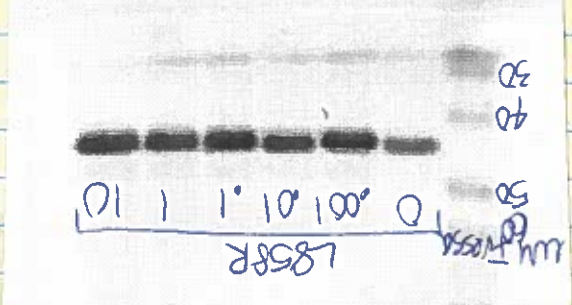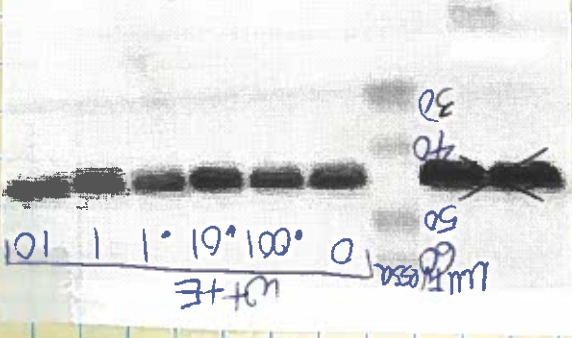

⑤ Fisher's anti- $\alpha$ -tubulin w/  $\alpha$ -EGFR (see ⑤)
