# Supplementary material for: Correction: Oncogenic Transformation by Inhibitor-Sensitive and -Resistant EGFR Mutants
Source: PubMed Central journal article supplement (PMC11405057; doi:10.1371/journal.pmed.1004470), 2024-09-16
Supplement: pmed.1004470.s007.pdf [file pmed.1004470.s007.pdf]

7/8/05

① Why is  $\alpha$ EGFR w/ or drug dose response

see 7/6 #3 for  $\alpha$ EGFR Y1868

see 7/6 #4 for  $\alpha$ EGFR

EGFR levels all the same; some of inspc sample may have floated out of well

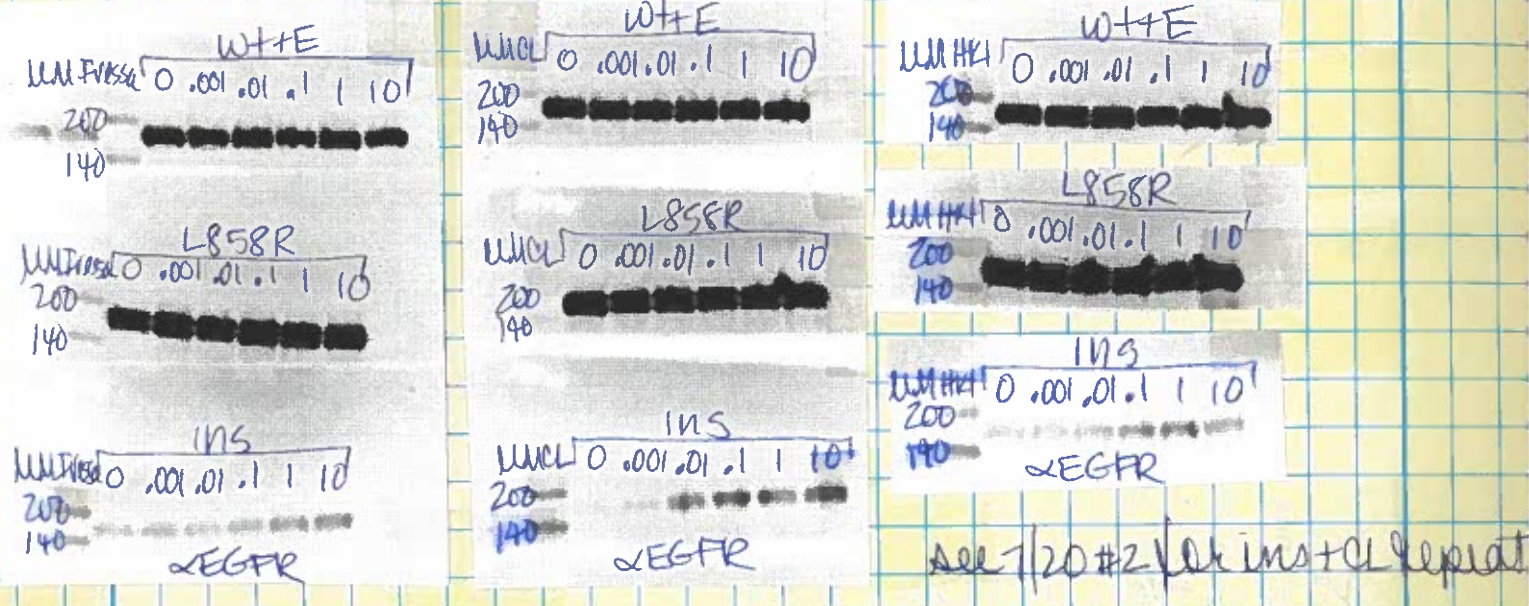

7/12/05

① Paper summary of ins mutation patients w/ treatment

| Reference                 | Response to treatment                  | Reference      | Agent                     | Not         |
|---------------------------|----------------------------------------|----------------|---------------------------|-------------|
| <b>untreated patients</b> |                                        |                |                           |             |
| <b>Treated patients</b>   |                                        |                |                           |             |
| V770-772 ins              | Shigematsu JNCI 2005 S768-V769 SV Ains | Stable disease | Eberhard et al Tarceva    | w/ch        |
| H774 ins                  | Shigematsu JNCI 2005 M766-A767 AIns    | Stable disease | Eberhard et al Tarceva    | w/ch        |
| G771 ins                  | Shigematsu JNCI 2005 D770_N771 ins SVD | Stable disease | Sequist and Lynch Tarceva | unpublished |
| V770-771 ins              | Shigematsu JNCI 2005                   |                |                           |             |
| V774ins, H775Y            | Shigematsu JNCI 2005                   |                |                           |             |
| I774-775 ins              | Shigematsu JNCI 2005                   |                |                           |             |
| H774-776 ins              | Shigematsu JNCI 2005                   |                |                           |             |
| V775-776 ins              | Shigematsu JNCI 2005                   |                |                           |             |
| _762insEAFQ               | Huang CCR 2004                         |                |                           |             |
| 58_D770dup                | Huang CCR 2004                         |                |                           |             |
| _762insEAFQ               | Kosaka CR 2004                         |                |                           |             |
| V_S768insTLA              | Kosaka CR 2004                         |                |                           |             |
| V_D770insASV              | Kosaka CR 2004                         |                |                           |             |
