# Supplementary material for: Correction: Oncogenic Transformation by Inhibitor-Sensitive and -Resistant EGFR Mutants
Source: PubMed Central journal article supplement (PMC11405057; doi:10.1371/journal.pmed.1004470), 2024-09-16

composite photos (TH) from 041505 duplicate CP  
 see 5 for quantitation file called "ITCL duplicate CP  
 050405 TH"

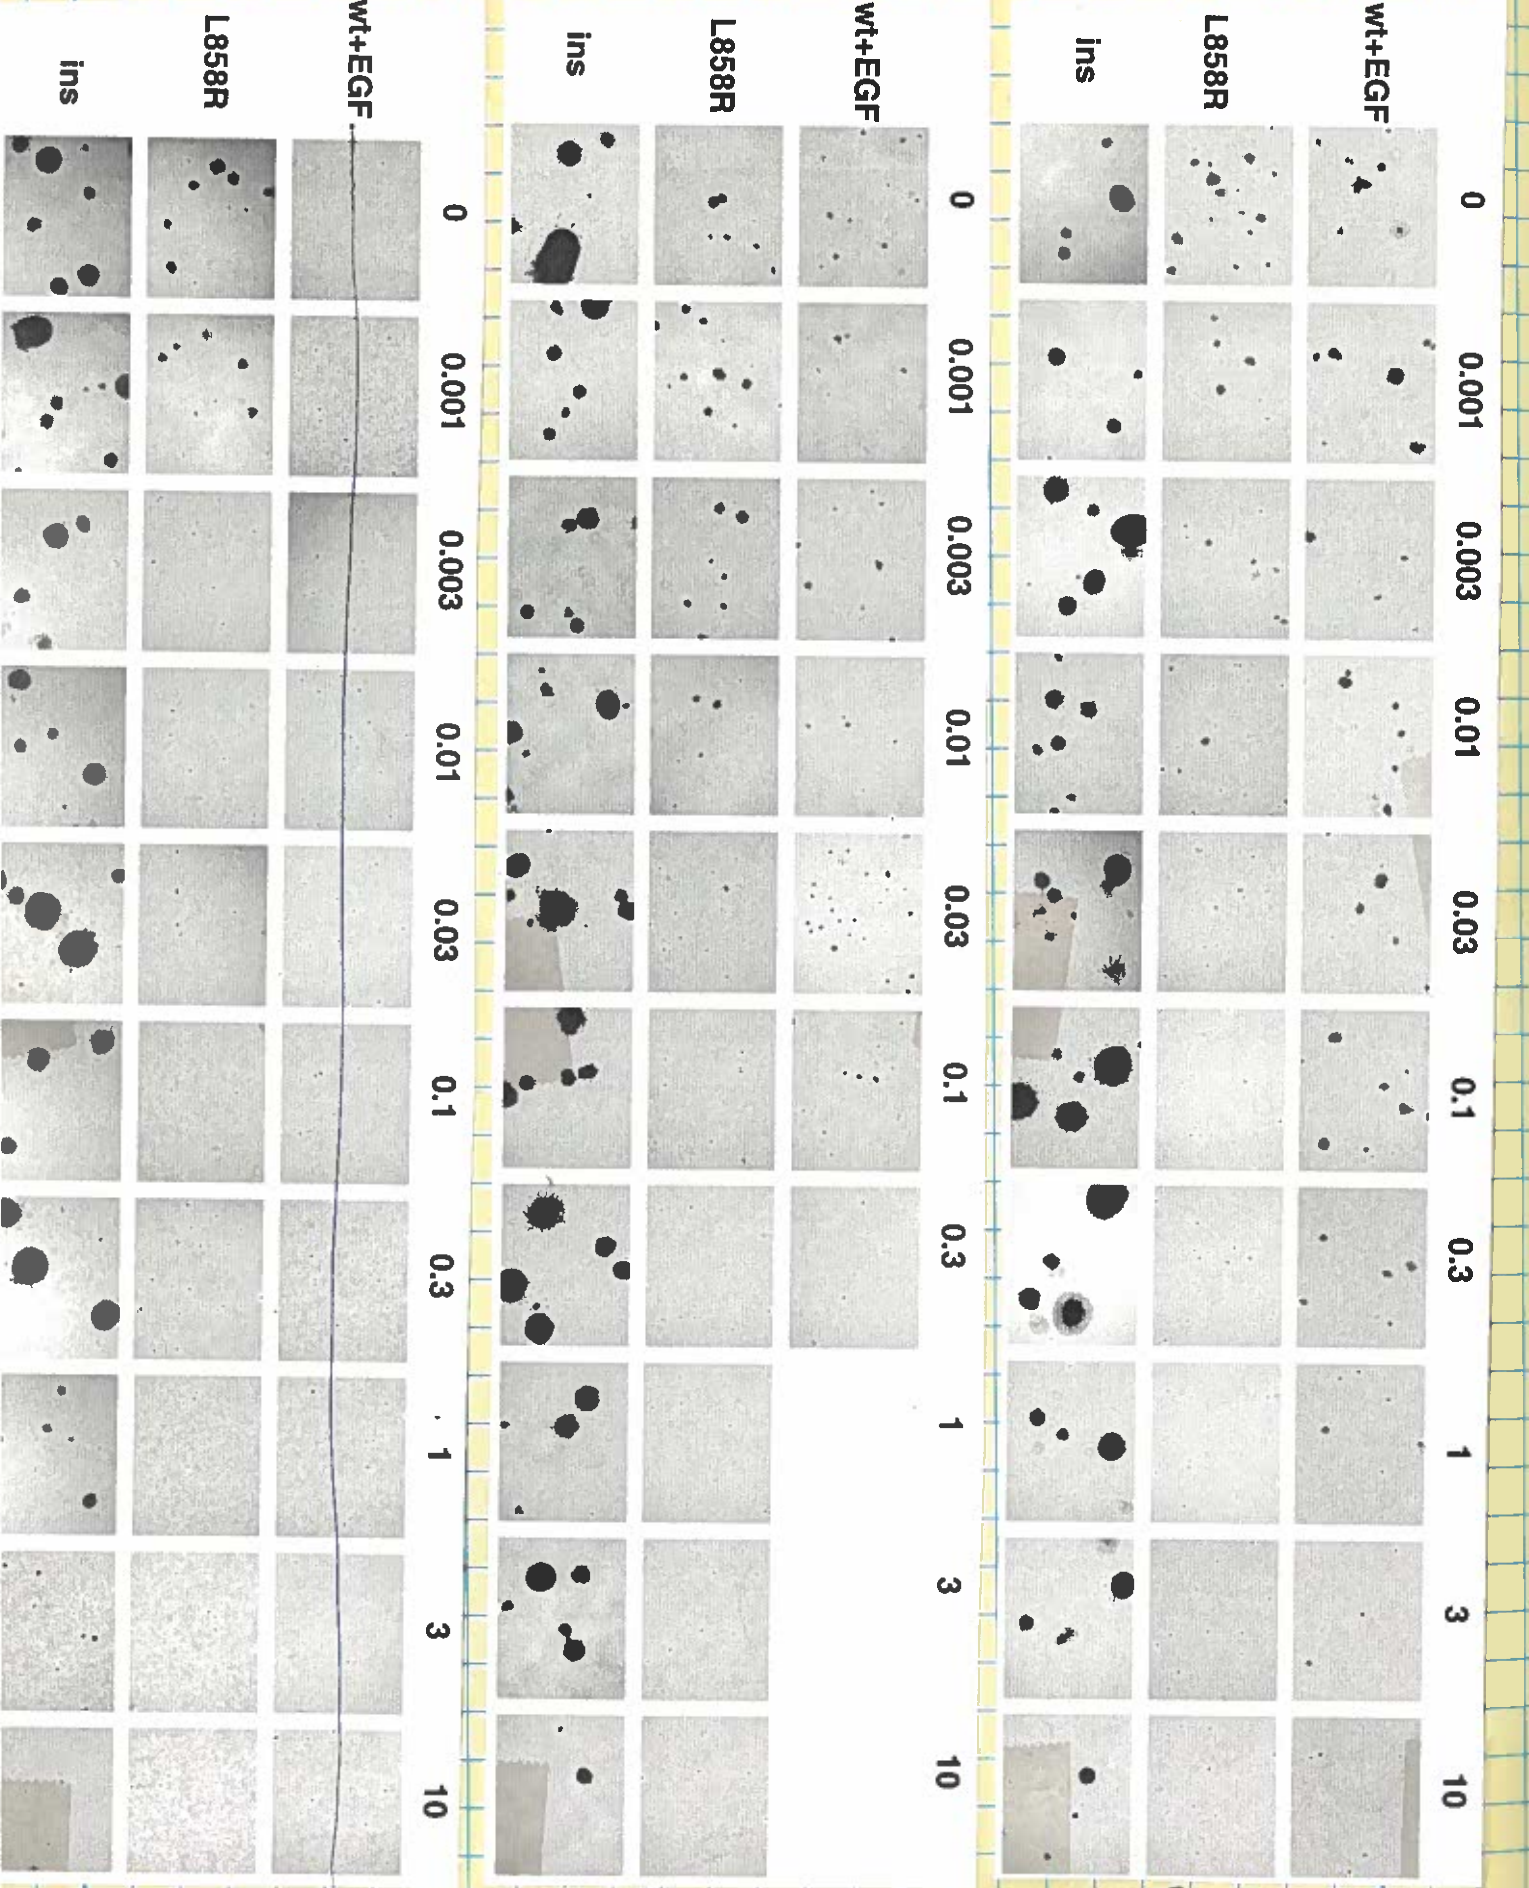

Supplement: pmed.1004470.s008.pdf [file pmed.1004470.s008.pdf]
