# Supplementary material for: Correction: Oncogenic Transformation by Inhibitor-Sensitive and -Resistant EGFR Mutants
Source: PubMed Central journal article supplement (PMC11405057; doi:10.1371/journal.pmed.1004470), 2024-09-16
Supplement: pmed.1004470.s009.pdf [file pmed.1004470.s009.pdf]

⑤ Graph showing the effect of insulin on the number of colonies formed by the yeast *S. cerevisiae* in the presence of different concentrations of insulin.

041505 Jha  
Tareeta Cl

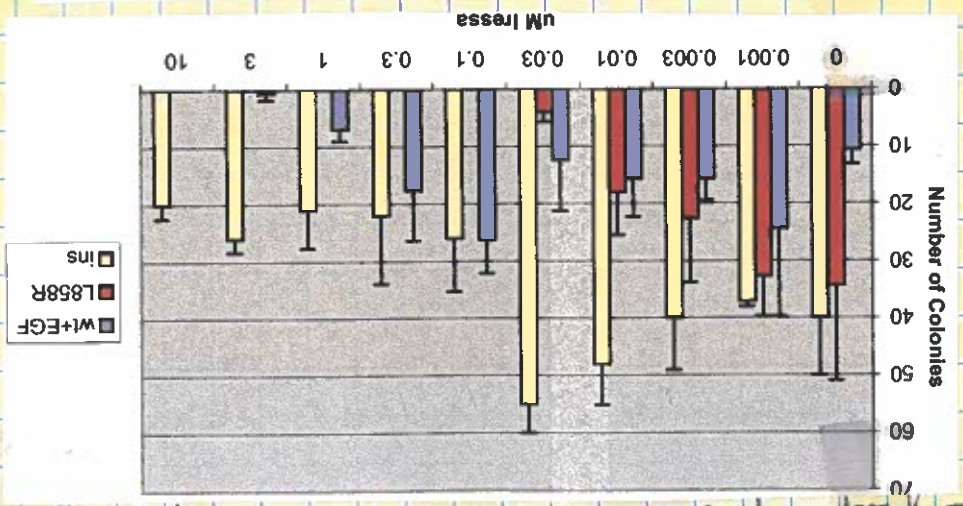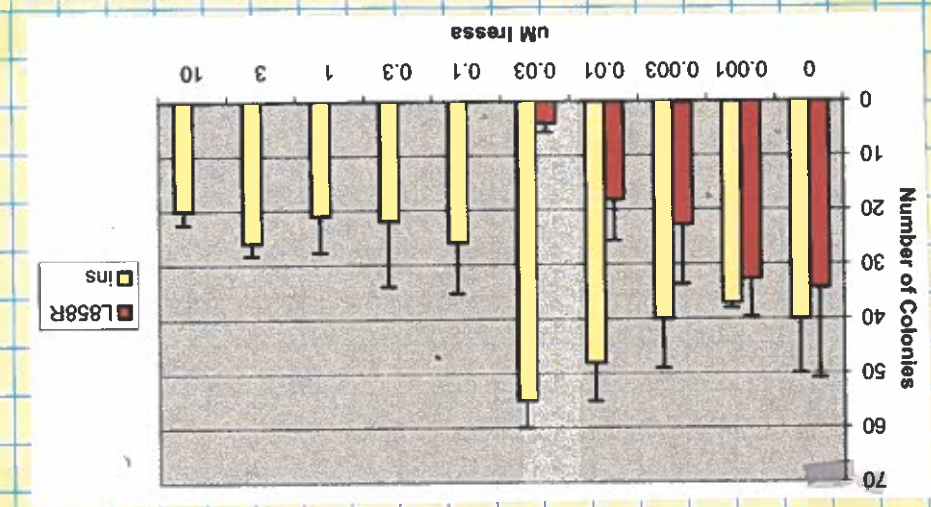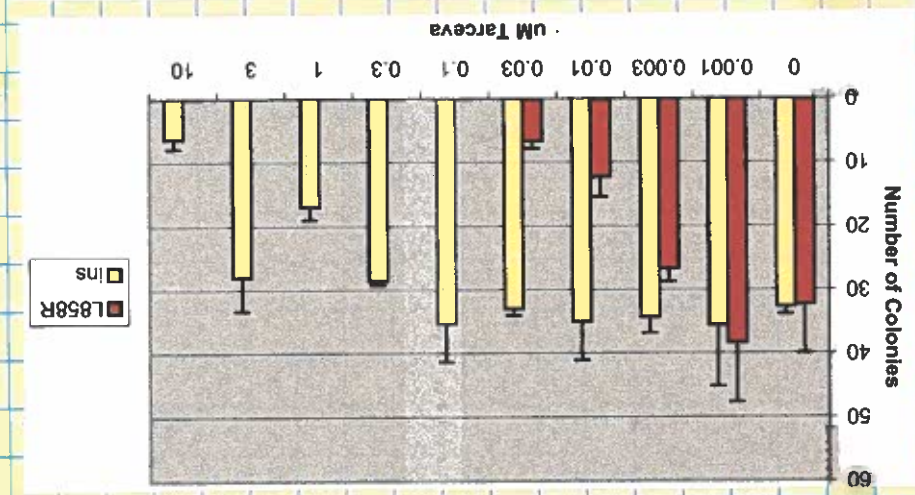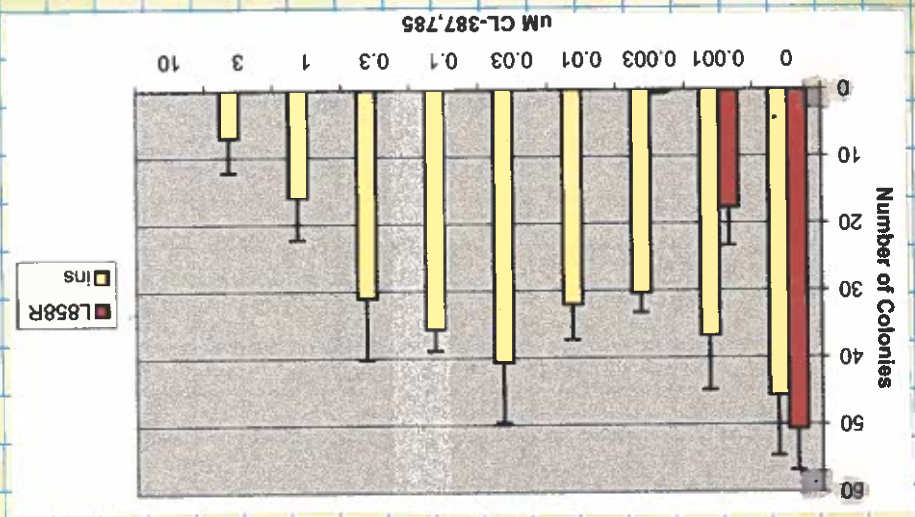

041505 Jha  
Tareeta Cl

041505 Jha  
Tareeta Cl

041505 Jha  
Tareeta Cl
