# Supplementary material for: Correction: Oncogenic Transformation by Inhibitor-Sensitive and -Resistant EGFR Mutants
Source: PubMed Central journal article supplement (PMC11405057; doi:10.1371/journal.pmed.1004470), 2024-09-16

5/6/05

① This photo composite of infection mutant polydivsclonal data indicates no mutations that accumulated during isolation of clonal cell line are responsible for ins mutant resistance to Iressa/Tarceva

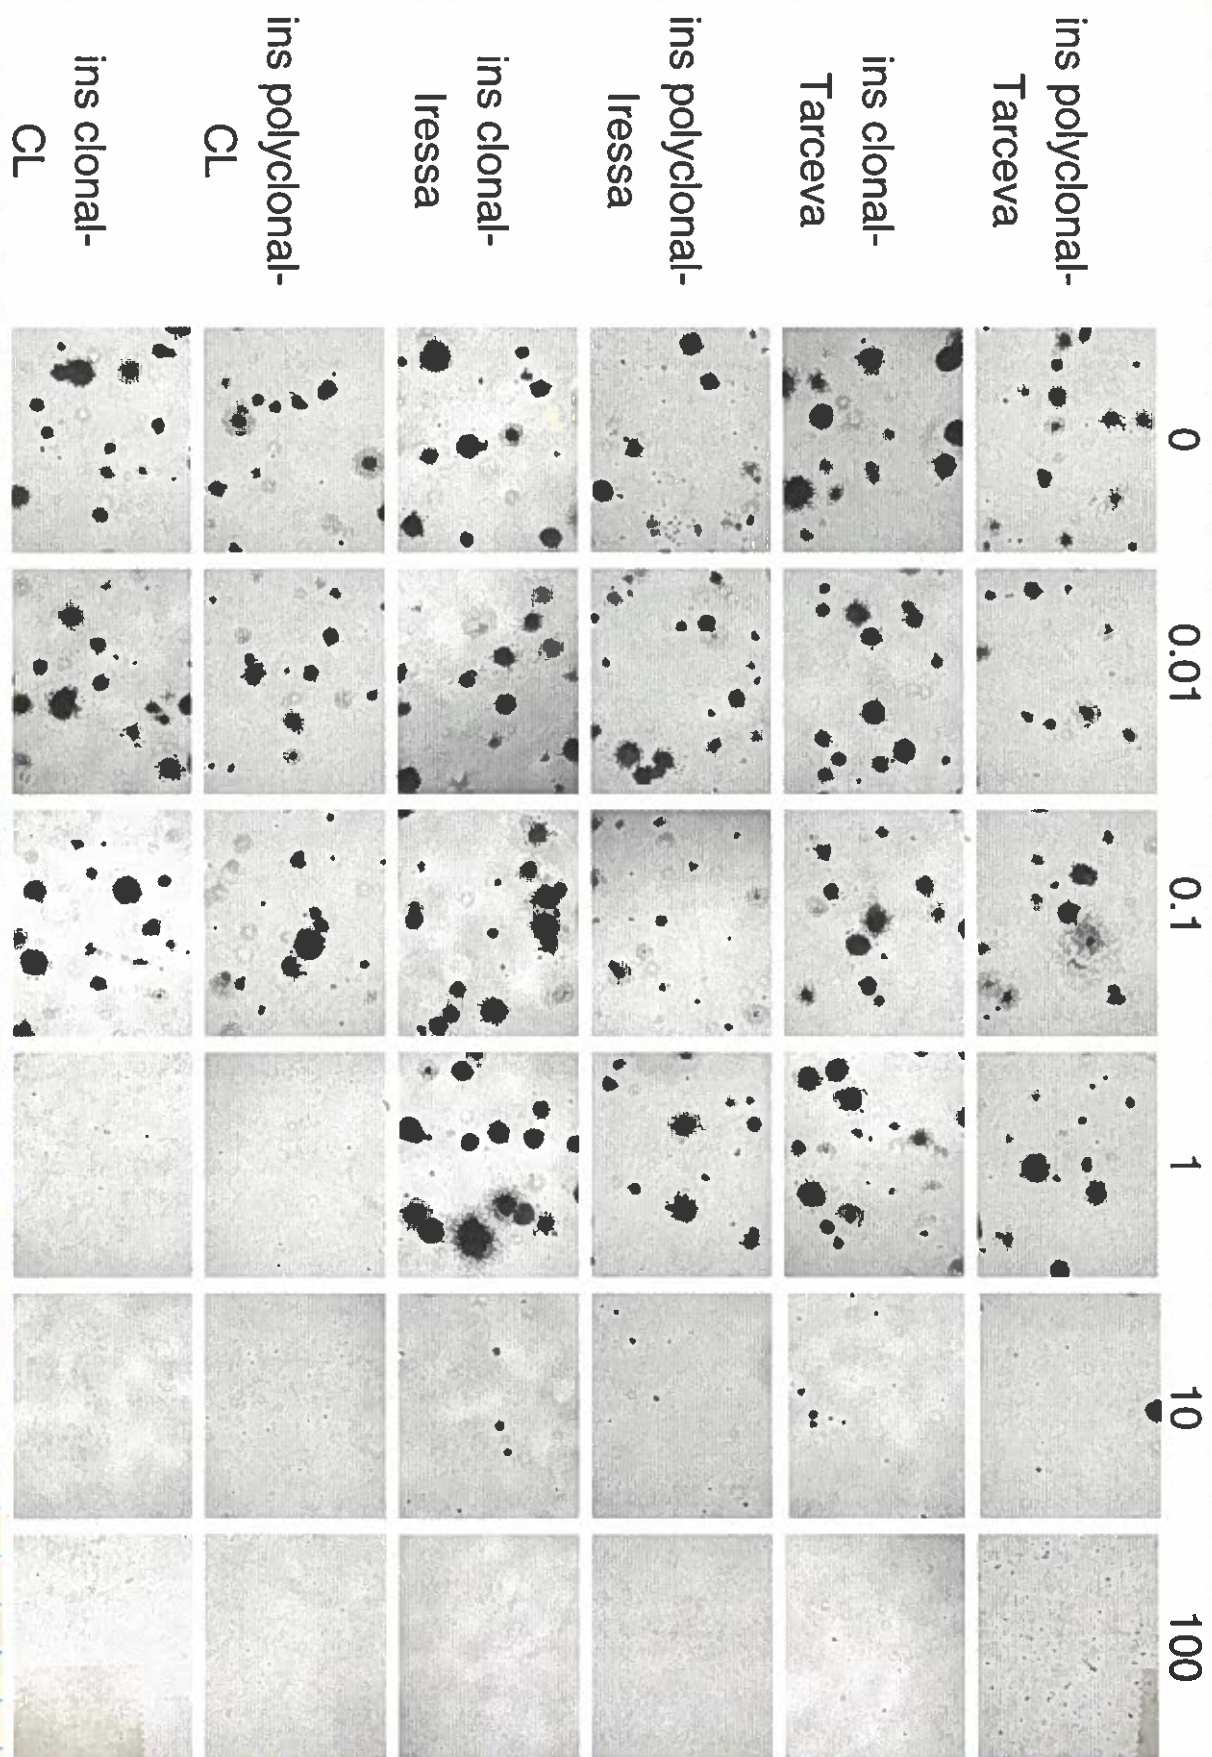

Supplement: pmed.1004470.s010.pdf [file pmed.1004470.s010.pdf]
