# Supplementary material for: Correction: Oncogenic Transformation by Inhibitor-Sensitive and -Resistant EGFR Mutants
Source: PubMed Central journal article supplement (PMC11405057; doi:10.1371/journal.pmed.1004470), 2024-09-16
Supplement: pmed.1004470.s011.pdf [file pmed.1004470.s011.pdf]

|                   |        |        |            |
|-------------------|--------|--------|------------|
| EC50              | 2.583  | 0.4122 | 0.1918     |
| LOGEC50           | 0.4122 | 0.4016 | -0.7172    |
| TOP (Constant)    | 100.0  | 100.0  | 100.0      |
| BOTTOM (Constant) | 0.0    | 0.0    | 0.0        |
|                   | Getfib | Erbnib | CL-387,785 |

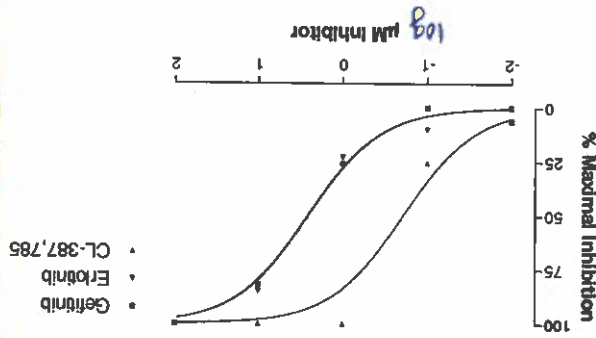

② Plasmid graph of clonal data in 80% max inhibition to maximum effect

WT 050405 pooled  
clonal and given  
C- more effective  
this experiment  
in 50% max  
are photos (5-11)  
explain discrepancy  
as a small estimate  
not counted here  
were counted in  
the plate (5-11)

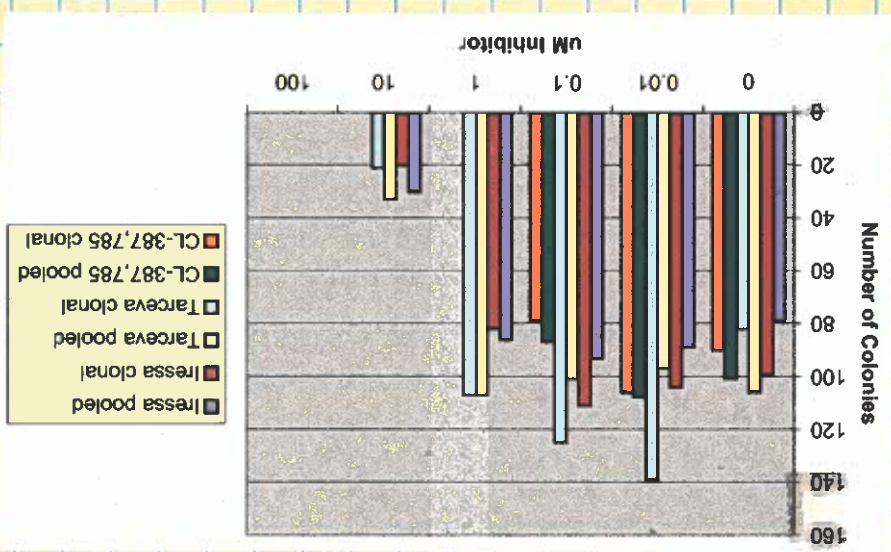

③ This pooled data vs clonal mutation, mutant CP

clonal mutant selected  
puro 16 days; ethD  
are 51% # (1/2) photo

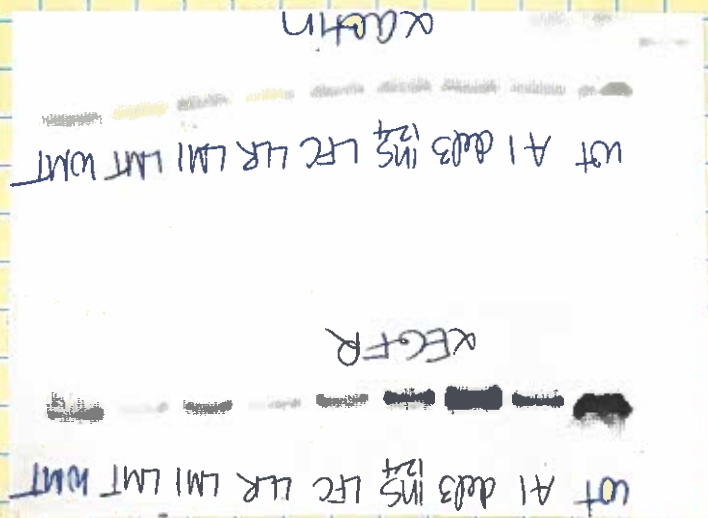

④ This anti-EGFR W on cell from CP 10/14/04 double mutant  
see ② for preliminary CP data summary  
are 31% # 1/2 for culture conditions
