# Supplementary material for: Correction: Oncogenic Transformation by Inhibitor-Sensitive and -Resistant EGFR Mutants
Source: PubMed Central journal article supplement (PMC11405057; doi:10.1371/journal.pmed.1004470), 2024-09-16
Supplement: pmed.1004470.s012.pdf [file pmed.1004470.s012.pdf]

① THIS 062205 WUCP  
 HIF REPORT SEEM TO BE OFFERED OVER TIME  
 TO HIFI DEPENDENT OVER TIME

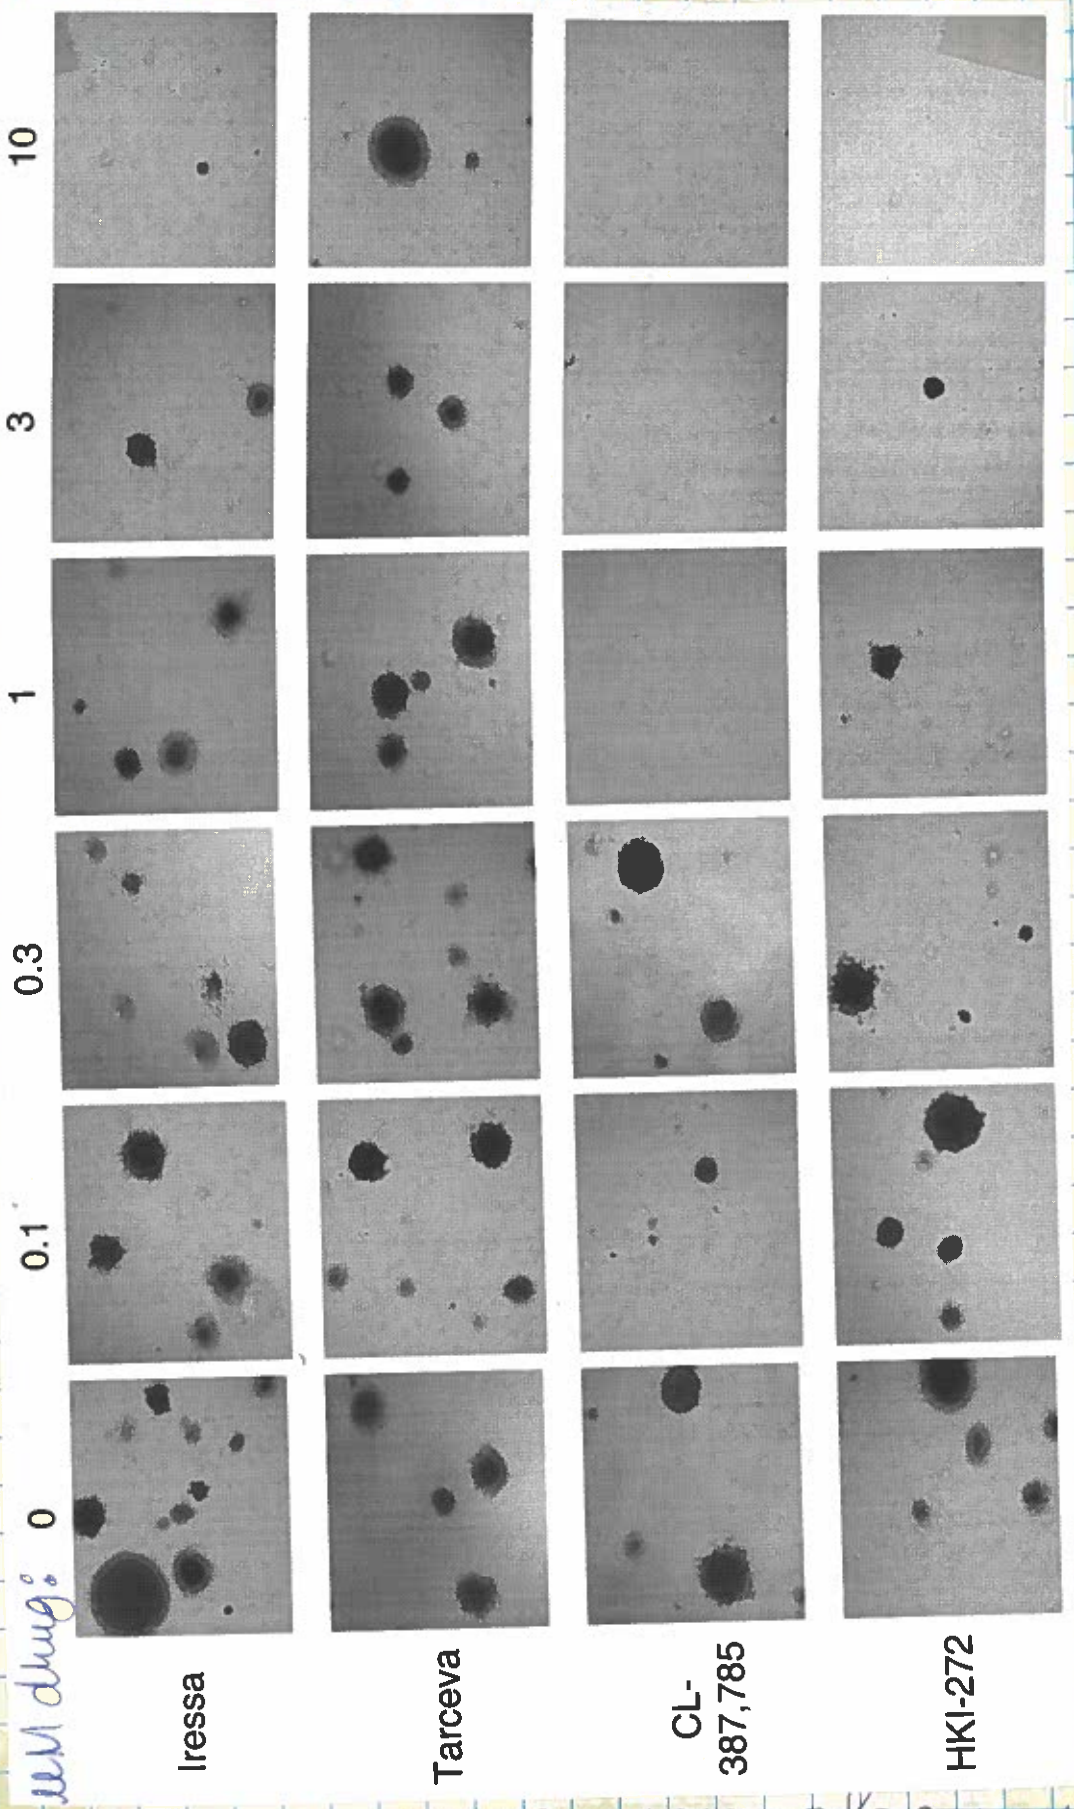

008 6/25 # 102 9/20/2005
