# Supplementary material for: Correction: Oncogenic Transformation by Inhibitor-Sensitive and -Resistant EGFR Mutants
Source: PubMed Central journal article supplement (PMC11405057; doi:10.1371/journal.pmed.1004470), 2024-09-16

③ 070705CP: IGF1R/IGF1R, IGF1R/IGF1R, IGF1R/IGF1R  
 compound is showing a positive effect on cell growth  
 HKI now almost like IGF1R/IGF1R (not in control)  
 with better growth wt & EGF (not in control)  
 with better growth wt & EGF (not in control)  
 710# Box @ EGF Y1068 data suit + cannot degraded, then new image off

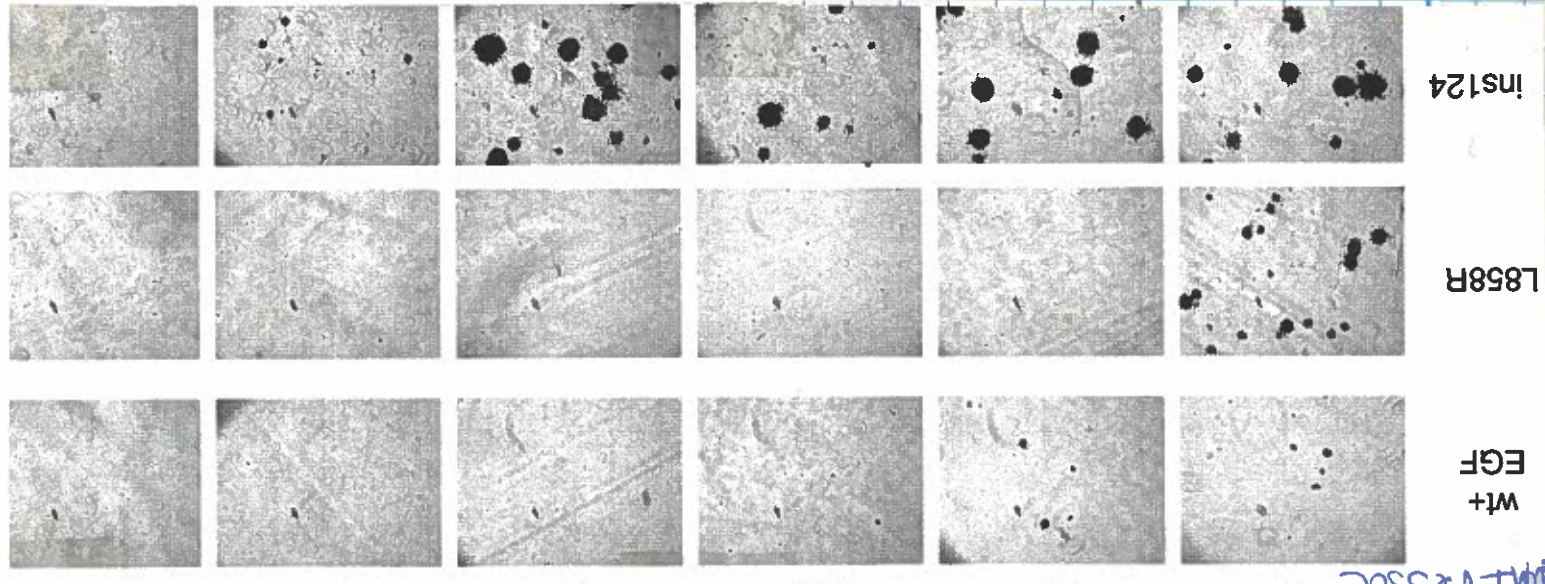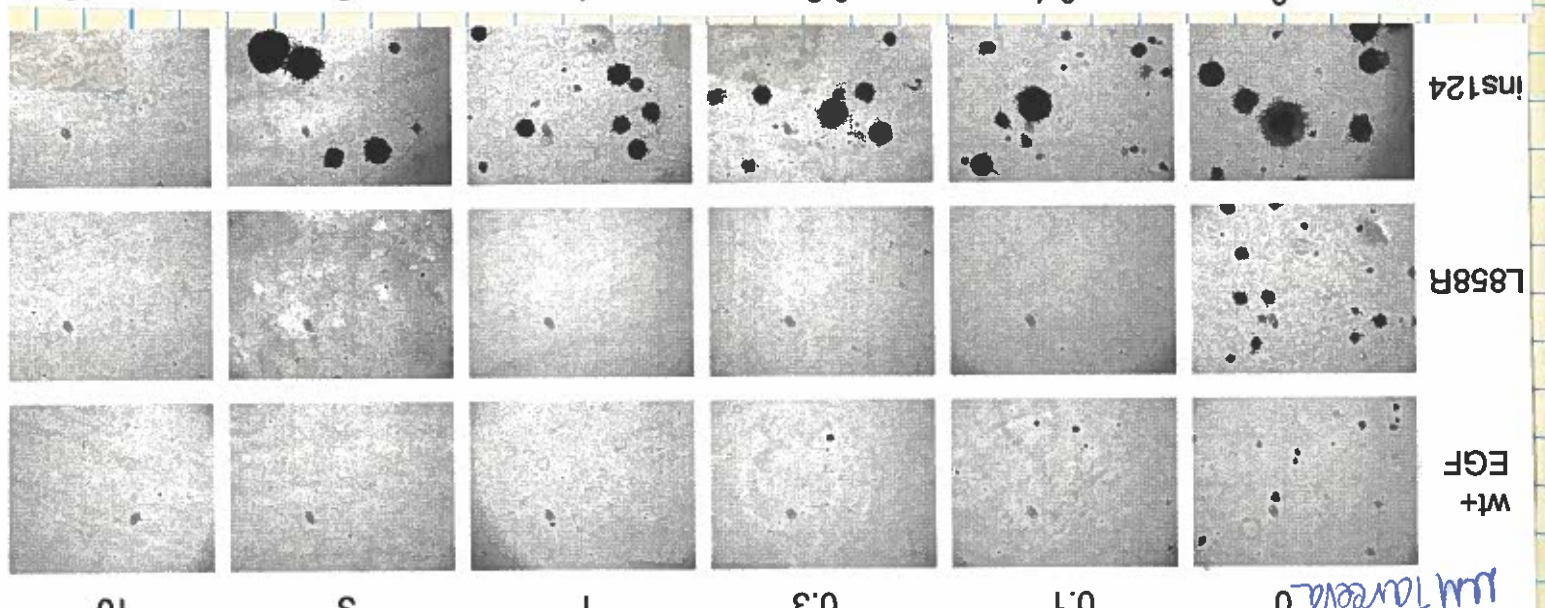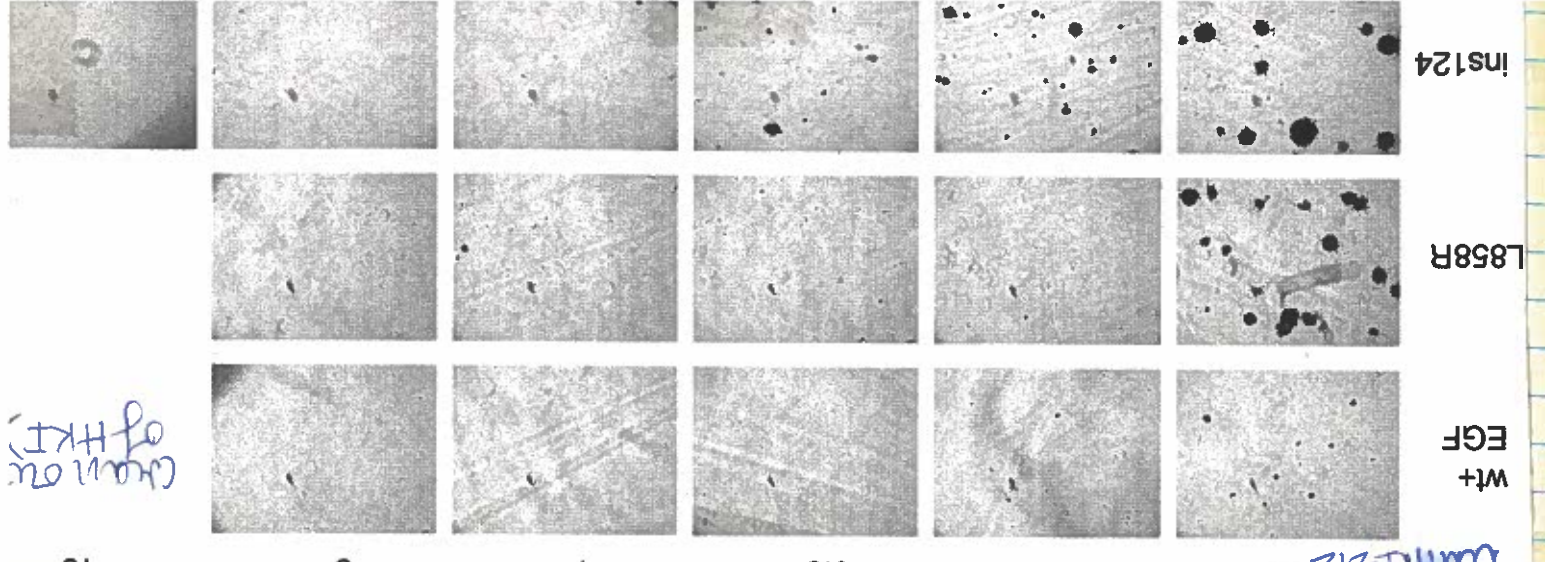

Supplement: pmed.1004470.s013.pdf [file pmed.1004470.s013.pdf]
