# Supplementary material for: Correction: Oncogenic Transformation by Inhibitor-Sensitive and -Resistant EGFR Mutants
Source: PubMed Central journal article supplement (PMC11405057; doi:10.1371/journal.pmed.1004470), 2024-09-16

④ THS DUSE del5HS construct  
 "DUSE del5HS D,E,FG 071805"  
 see 3/16/05 #2 for HS deletion description  
 2239-2250 del A225C L747 A750 del T751P ✓  
 2349 (2361) CAG → CAA gln → gln (silent)  
 looks good.  
 new cut out & transfer to pBabe puro

⑤ WF/TH/HG 070705/071805 CP w/repending  
 all drug responses shifted back ~ log but no real  
 differences

see ③ for photos

compare w/:

- 10/16 #2
- 3/18 #3
- 5/4/05 #8
- 6/25/05 #1

wt+EGF Triplicate Colony Assay

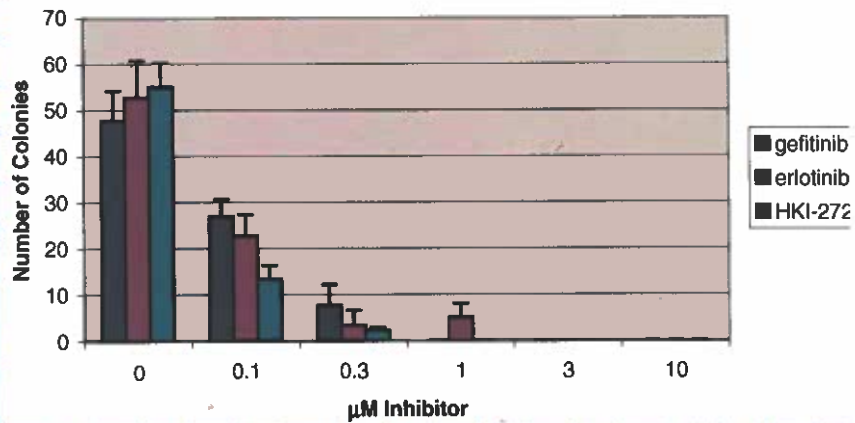

L858R Triplicate Colony Assay

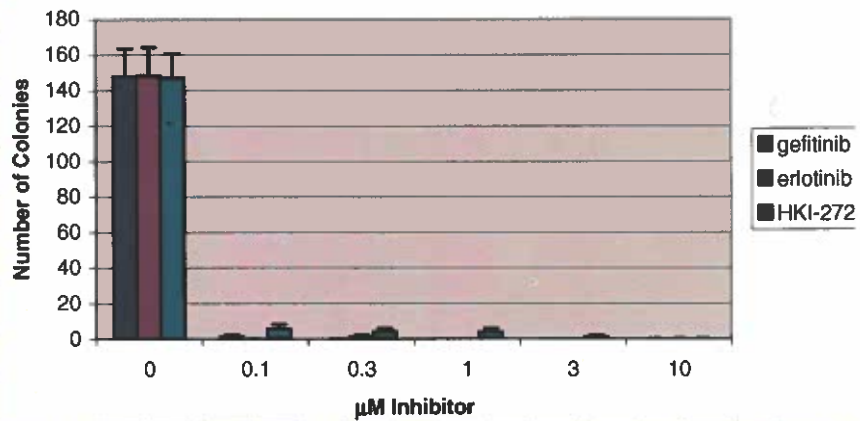

Insertion Mutant Triplicate Colony Assay

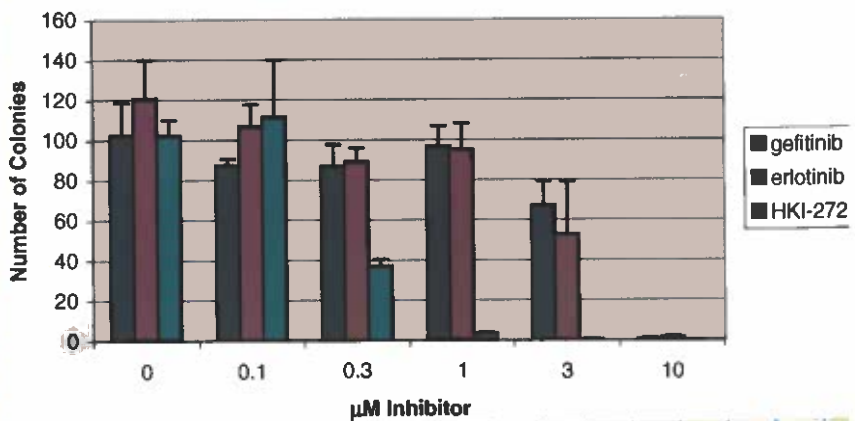

Supplement: pmed.1004470.s014.pdf [file pmed.1004470.s014.pdf]
