# Supplementary material for: Correction: Oncogenic Transformation by Inhibitor-Sensitive and -Resistant EGFR Mutants
Source: PubMed Central journal article supplement (PMC11405057; doi:10.1371/journal.pmed.1004470), 2024-09-16
Supplement: pmed.1004470.s015.pdf [file pmed.1004470.s015.pdf]

② TH5 Torcova CPr additional insertion & del mutants

dyplonal

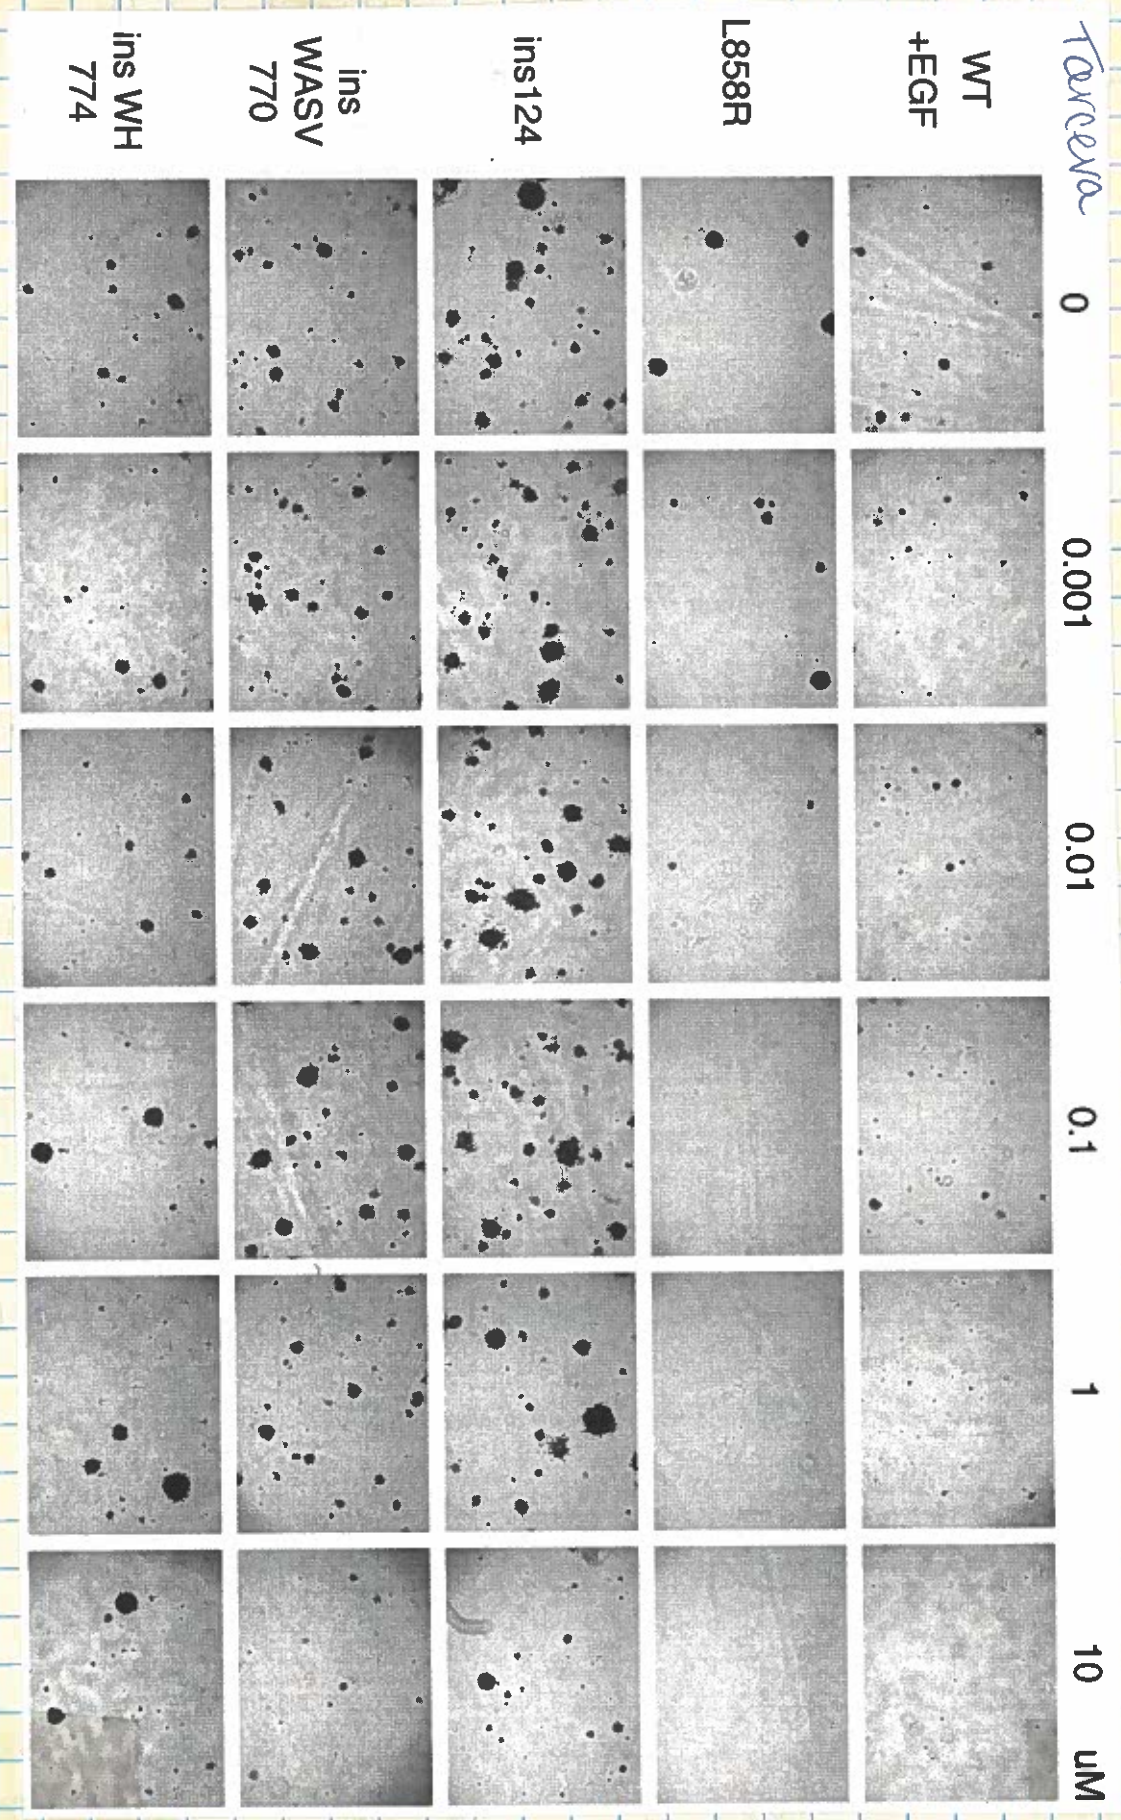

looks great! additional upon 20 μM mutants are resistant to Torcova  
 ins124 = V719 T770 P771 A772  
 ins = L773 V774 insH
