# Supplementary material for: Correction: Oncogenic Transformation by Inhibitor-Sensitive and -Resistant EGFR Mutants
Source: PubMed Central journal article supplement (PMC11405057; doi:10.1371/journal.pmed.1004470), 2024-09-16
Supplement: pmed.1004470.s016.pdf [file pmed.1004470.s016.pdf]

9/1/05  
 DT mutagenesis colony assay w/ full panel of EGFR ins & del mutants

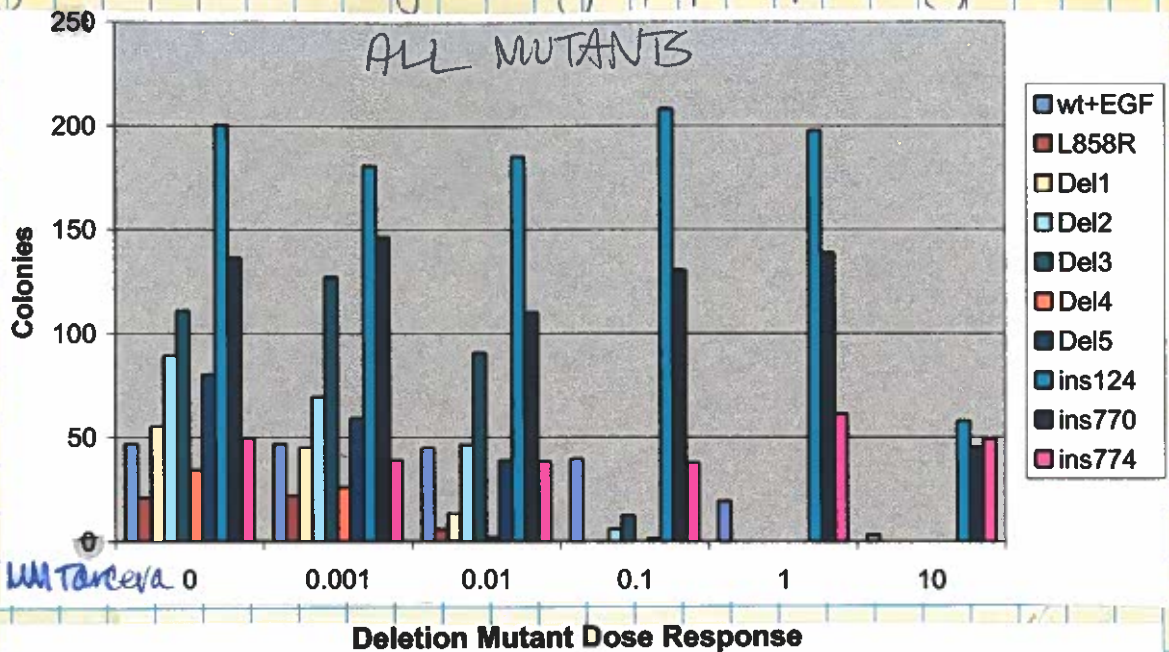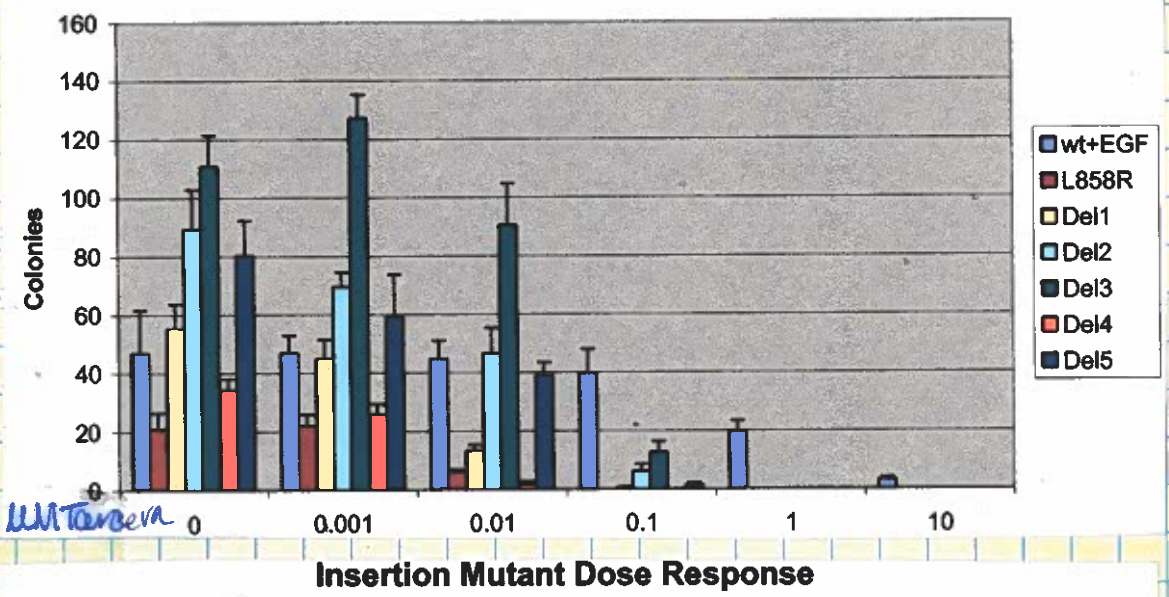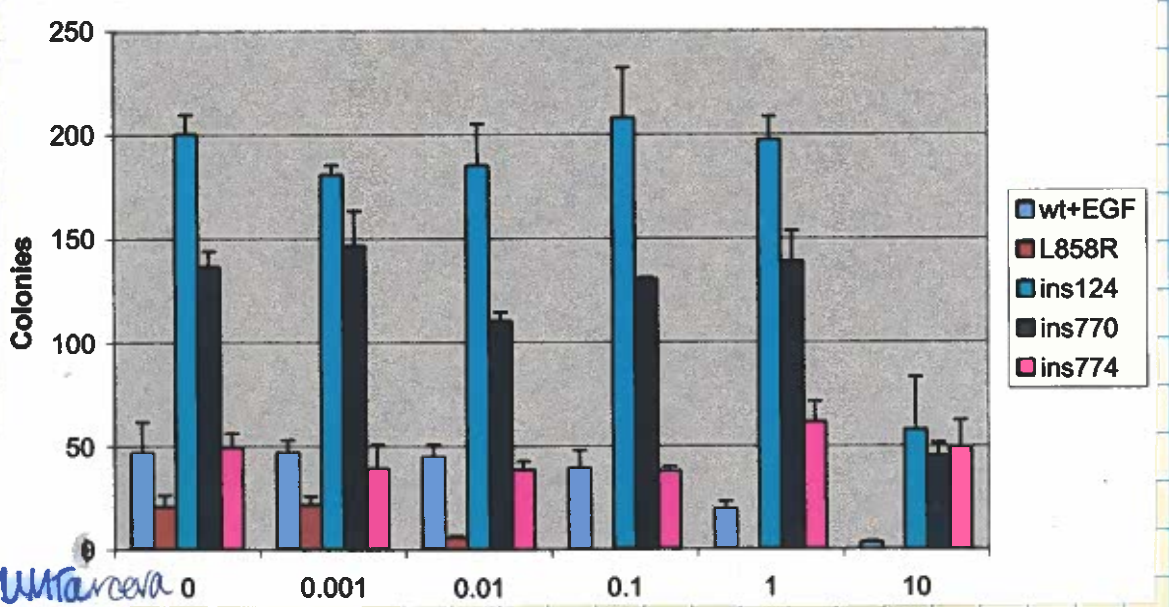

WT ins NPG  
 770 = 9LDTTQVETEV  
 774 = 73 VTK4VSH

see 8/10  
 colour  
 see 10  
 VTK4VSH  
 graph
